# Supplementary material
Source: PubMed Central journal article supplement (PMC3694420)
Supplement: NIHMS445563-supplement-01.pdf [file NIHMS445563-supplement-01.pdf]

### ***Potential Role of miRNAs in Pediatric HF***

Analysis of potential miRNA targets was based on changes in miRNA expression shown in Figure 1B. Differences in fold change are consistent with changes observed in adult miRNA expression [1]. Interestingly, miR-133a does not change in response to treatment, but expression of miR-133b is increased in PDEi-treated patients. It is likely that miR-133a and miR-133b have similar targets since they have identical seed sequences. Up-regulation of miR-133a is protective in the setting of cardiac pathology, preventing the transition to a dilated phenotype [2]. It is possible that up-regulation of miR-133b in PDEi-treated patients correlates with a beneficial response to treatment. miR-125a/b is induced in early hypertrophic growth [3], and although expression of this miRNA was not significantly increased by array, it was increased by RT-PCR in HF patients. Expression of miR-27b is also increased in PDEi-treated patients. An increase in miR-27b expression results in increased levels of  $\beta$ -myosin heavy chain (MyHC) [4], but it is also anti-hypertrophic in cardiomyocytes [5]. Expression levels of miR-204 were increased in PDEi-treated patients. Down-regulation of miR-204 in rats is associated with autophagy [6], and up-regulation of miR-204 reduces disease severity in pulmonary hypertension [7], and may correlate with the beneficial response to treatment in PDEi-treated IDC patients. Conversely to what was observed by array, miR-146a was up-regulated in PDEi-treated patients. Up-regulation of miR-146a is mediated by IL-1 $\beta$ , and miR-146a is involved in orchestrating inflammation [8]. This suggests that inflammation may be an important aspect of pediatric IDC. Over-expression of miR-195 is involved in cardiac hypertrophy and failure [2]. Although expression of this miRNA was not significantly increased by array, it was by RT-PCR, and it may be involved in the

hypertrophic response. Although expression of miR-7 and miR-223 changed significantly by array, this was not observed by RT-PCR. Expression of miR-7, miR-223 and miR-146a was very low by array which may have prevented an accurate measurement. Expression of miR-21 consistently changes in adult human and animal heart failure models [2]. However, we failed to observe changes in its expression by array or RT-PCR. miR-21 is involved in fibrosis which is rare in pediatric HF [9], and could be related to the lack of changes in miR-21 expression. Expression of the contractile-related miRNAs, miR-208a, miR-208b and miR-499 was also analyzed. Expression of miR-208a, 208b and miR-499 is increased in adult human HF [10], however, this has not been shown in all studies. A recent study has shown that down-regulation of miR-208a is beneficial in a heart disease model [11], and it is interesting that miR-208a is not increased in pediatric IDC patients. miR-1 can be up- or down-regulated in adult HF, and studies have shown that up-regulation of miR-1 can be protective in a hypertrophic setting [2]. Interestingly, miR-1 is up-regulated only in treated patients. Finally, we had previously shown that miR-486-5p is down-regulated in adult HF by miRNA array [1]. We were not able to confirm down-regulation of miR-486-5p by RT-PCR in adult HF patients (data not shown). However, expression of miR-486-5p is significantly decreased in PDEi-treated pediatric IDC patients. Not much is known about this miRNA in myocytes. However, it is known to target FOXO1, which promotes cardiomyocyte survival [12], and the histone deacetylase Sirt1, which may increase cells proliferation [13], suggesting that down-regulation of miR-486-5p may be involved in promoting cellular proliferation, and could contribute to the beneficial clinical effects of PDEi treatment in children with IDC.

## References:

- [1] Sucharov C, Bristow MR, Port JD. miRNA expression in the failing human heart: functional correlates. *J Mol Cell Cardiol.* 2008;45:185-92.
- [2] Topkara VK, Mann DL. Role of microRNAs in cardiac remodeling and heart failure. *Cardiovasc Drugs Ther.* 2011;25:171-82.
- [3] Busk PK, Cirera S. MicroRNA profiling in early hypertrophic growth of the left ventricle in rats. *Biochem Biophys Res Commun.* 2010;396:989-93.
- [4] Abdellatif M. Differential expression of microRNAs in different disease states. *Circ Res.* 2012;110:638-50.
- [5] Jentsch C, Leierseder S, Loyer X, Flohrschutz I, Sassi Y, Hartmann D, et al. A phenotypic screen to identify hypertrophy-modulating microRNAs in primary cardiomyocytes. *J Mol Cell Cardiol.* 2012;52:13-20.
- [6] Xiao J, Zhu X, He B, Zhang Y, Kang B, Wang Z, et al. MiR-204 regulates cardiomyocyte autophagy induced by ischemia-reperfusion through LC3-II. *J Biomed Sci.* 2011;18:35.
- [7] Courboulin A, Paulin R, Giguere NJ, Saksouk N, Perreault T, Meloche J, et al. Role for miR-204 in human pulmonary arterial hypertension. *J Exp Med.* 2011;208:535-48.
- [8] Curtale G, Citarella F, Carissimi C, Goldoni M, Carucci N, Fulci V, et al. An emerging player in the adaptive immune response: microRNA-146a is a modulator of IL-2 expression and activation-induced cell death in T lymphocytes. *Blood.* 2010;115:265-73.
- [9] Sato H, Shiraishi I, Takamatsu T, Hamaoka K. Detection of TUNEL-positive cardiomyocytes and c-kit-positive progenitor cells in children with congenital heart disease. *J Mol Cell Cardiol.* 2007;43:254-61.
- [10] Satoh M, Minami Y, Takahashi Y, Tabuchi T, Nakamura M. Expression of microRNA-208 is associated with adverse clinical outcomes in human dilated cardiomyopathy. *J Card Fail.* 2010;16:404-10.
- [11] Montgomery RL, Hullinger TG, Semus HM, Dickinson BA, Seto AG, Lynch JM, et al. Therapeutic inhibition of miR-208a improves cardiac function and survival during heart failure. *Circulation.* 2011;124:1537-47.
- [12] Xu J, Li R, Workeneh B, Dong Y, Wang X, Hu Z. Transcription factor FoxO1, the dominant mediator of muscle wasting in chronic kidney disease, is inhibited by microRNA-486. *Kidney Int.* 2012.
- [13] Kim YJ, Hwang SH, Lee SY, Shin KK, Cho HH, Bae YC, et al. miR-486-5p Induces Replicative Senescence of Human Adipose Tissue-Derived Mesenchymal Stem Cells and Its Expression Is Controlled by High Glucose. *Stem Cells Dev.* 2012;21:1749-60.

## **Figure Legends:**

Figure S1: Pathway analysis for putative mRNA targets of miRNAs that change in PDEi-treated IDC patients. (A) miR-1, (B) miR-27b, (C) miR-133b, (D) miR-146a, (E) miR-204, (F) miR-486-5p.

Table S1: Patient Subject Characteristic and Analysis

Table S2: Common putative targets regulated by a minimum of three PDEi-up-regulated miRNAs

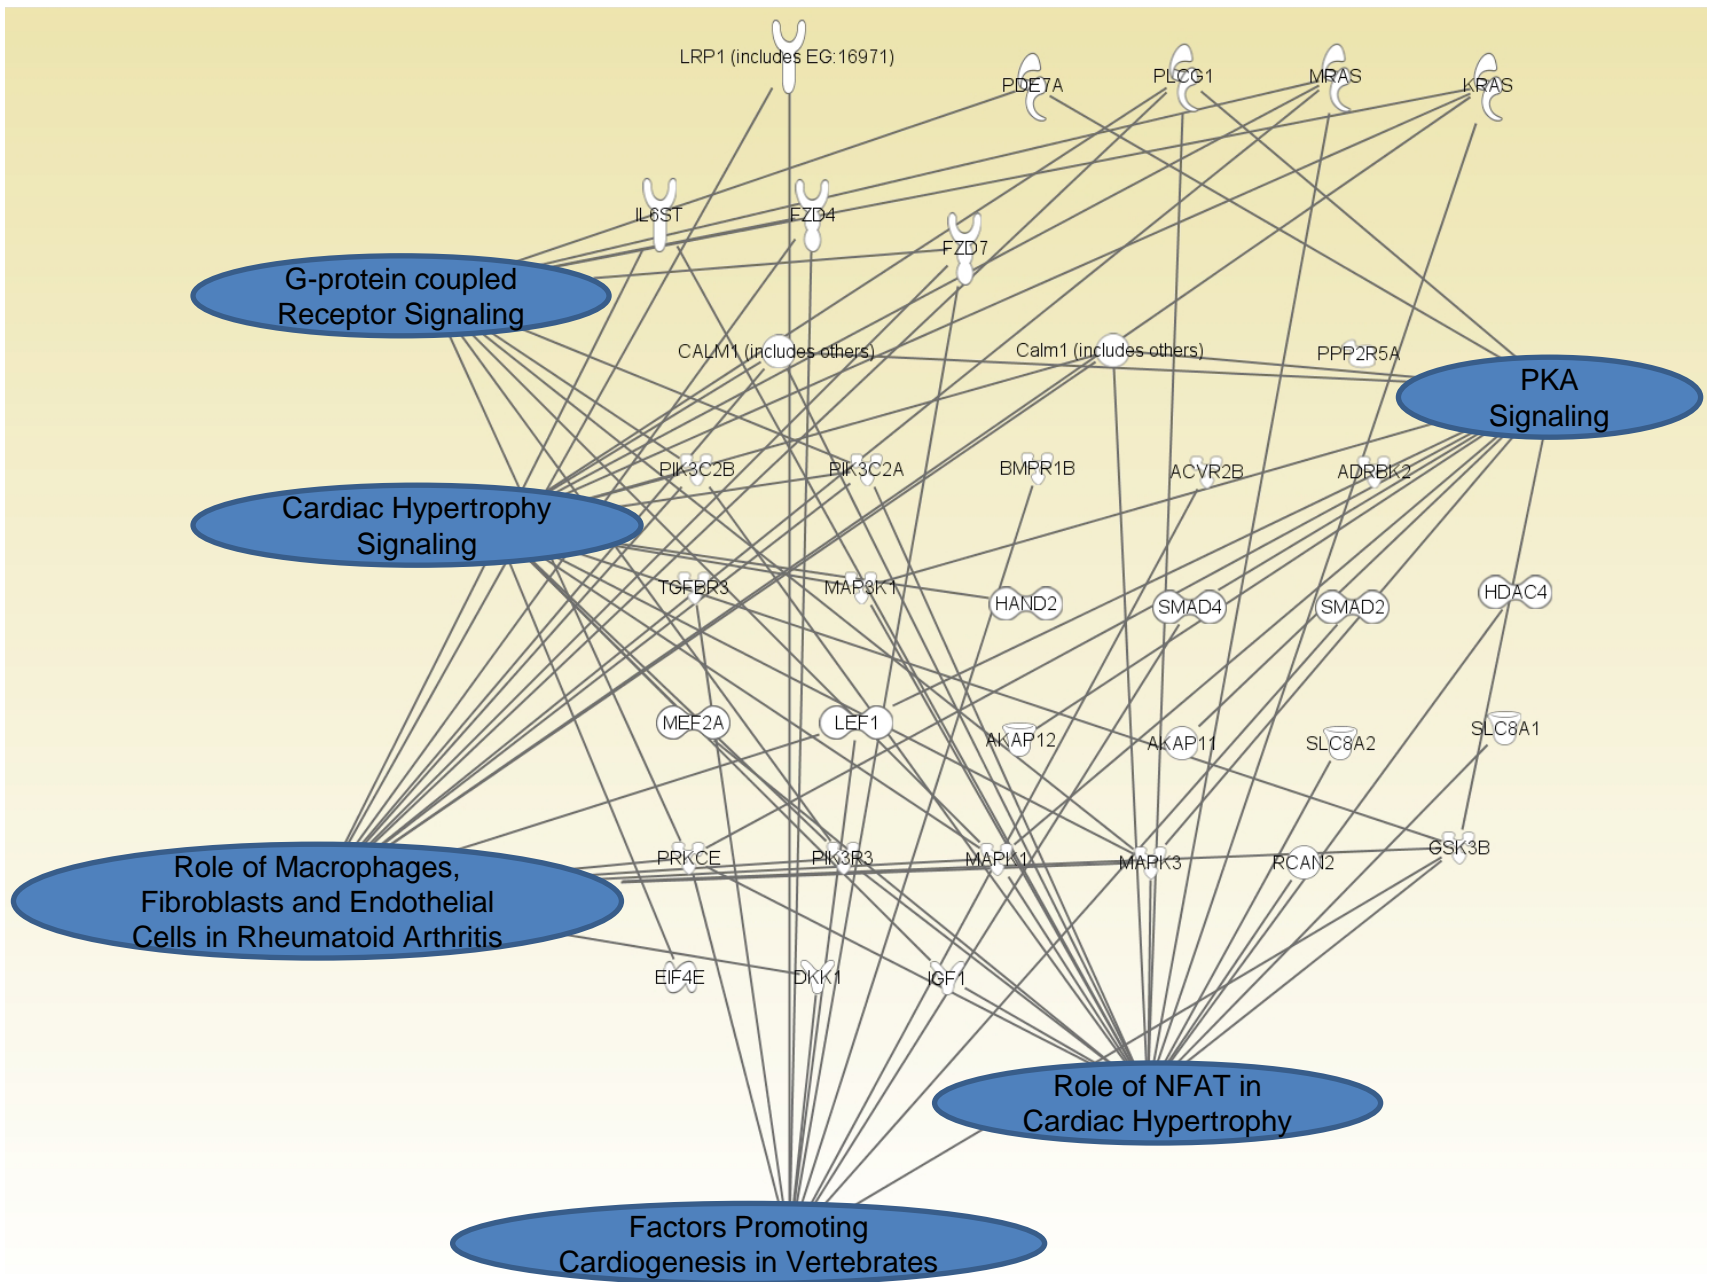

A.

Figure S1

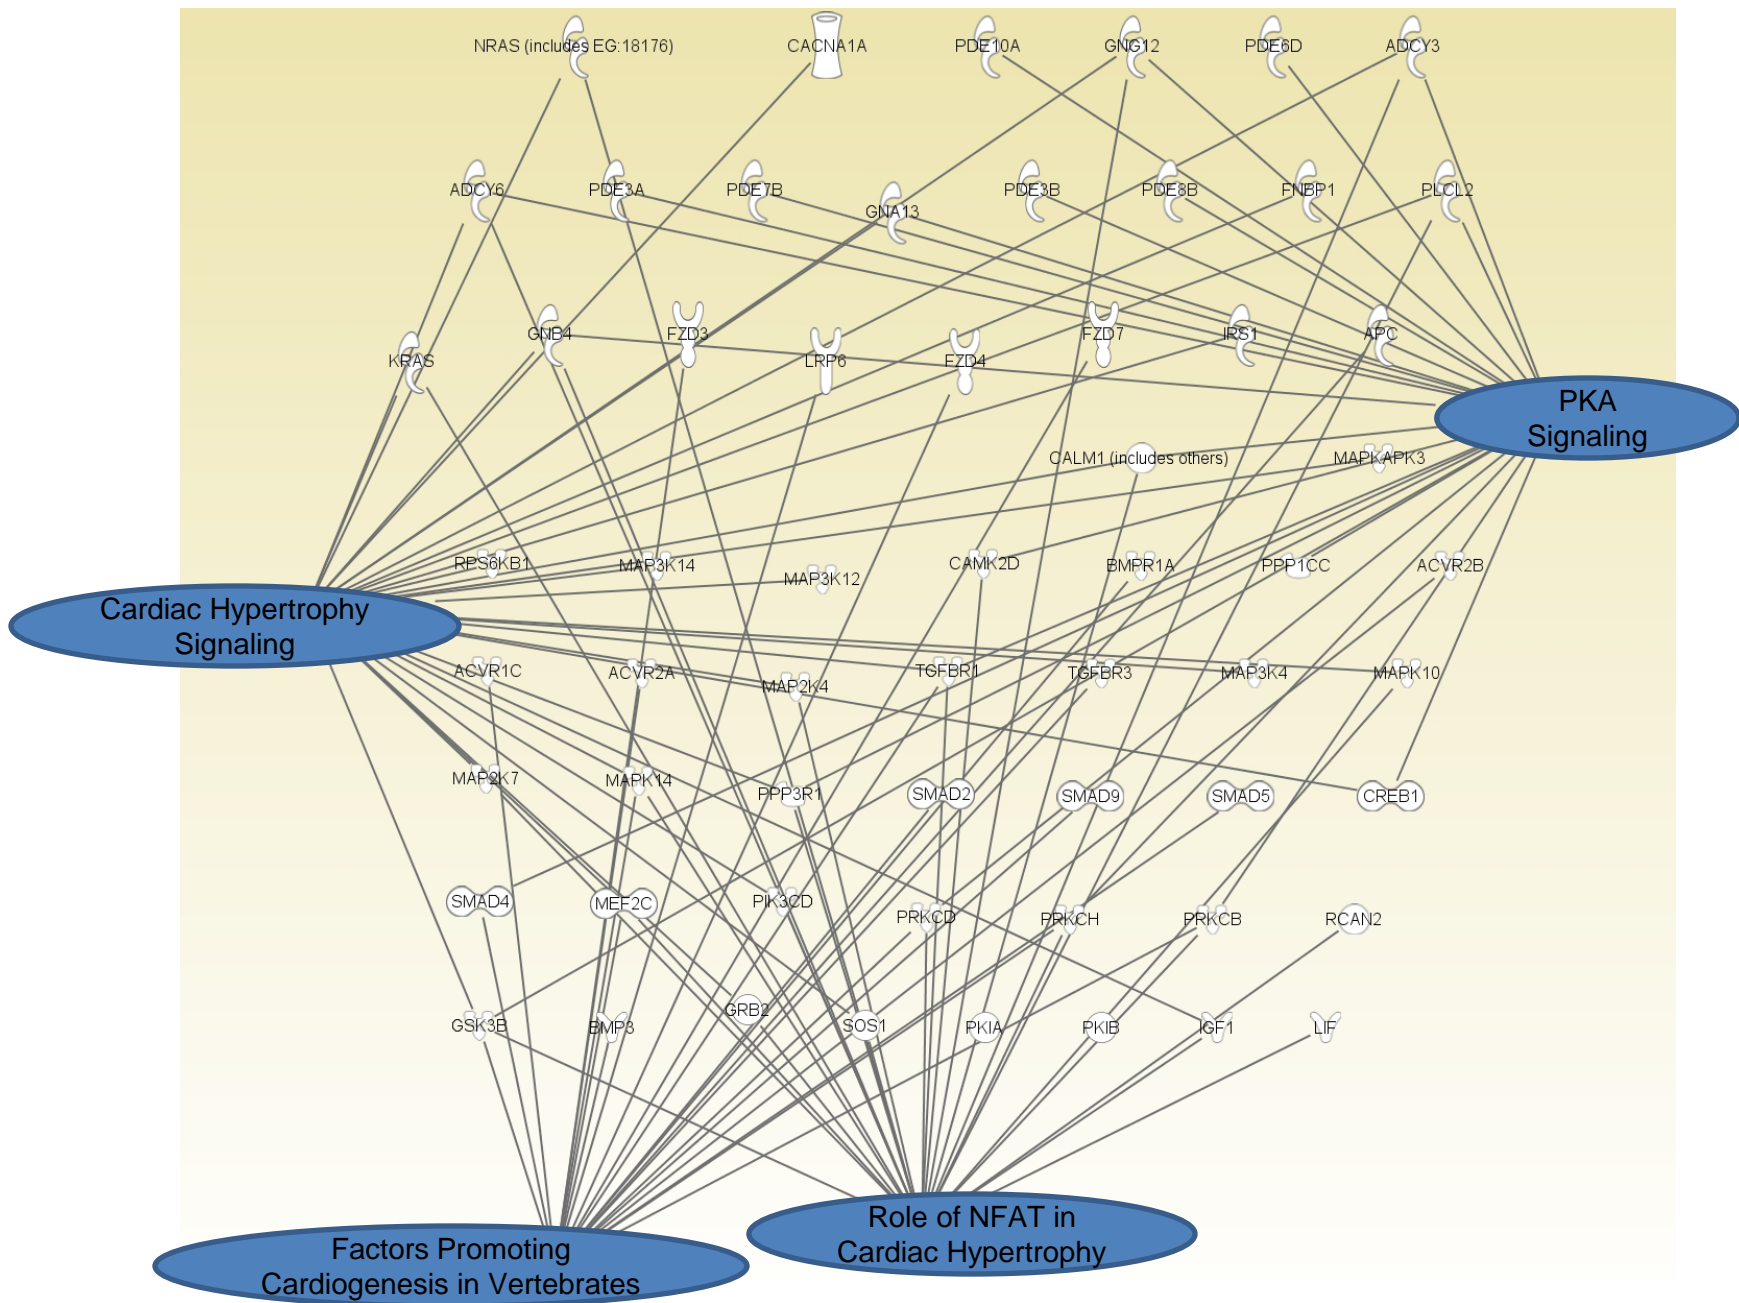

B.

Figure S1

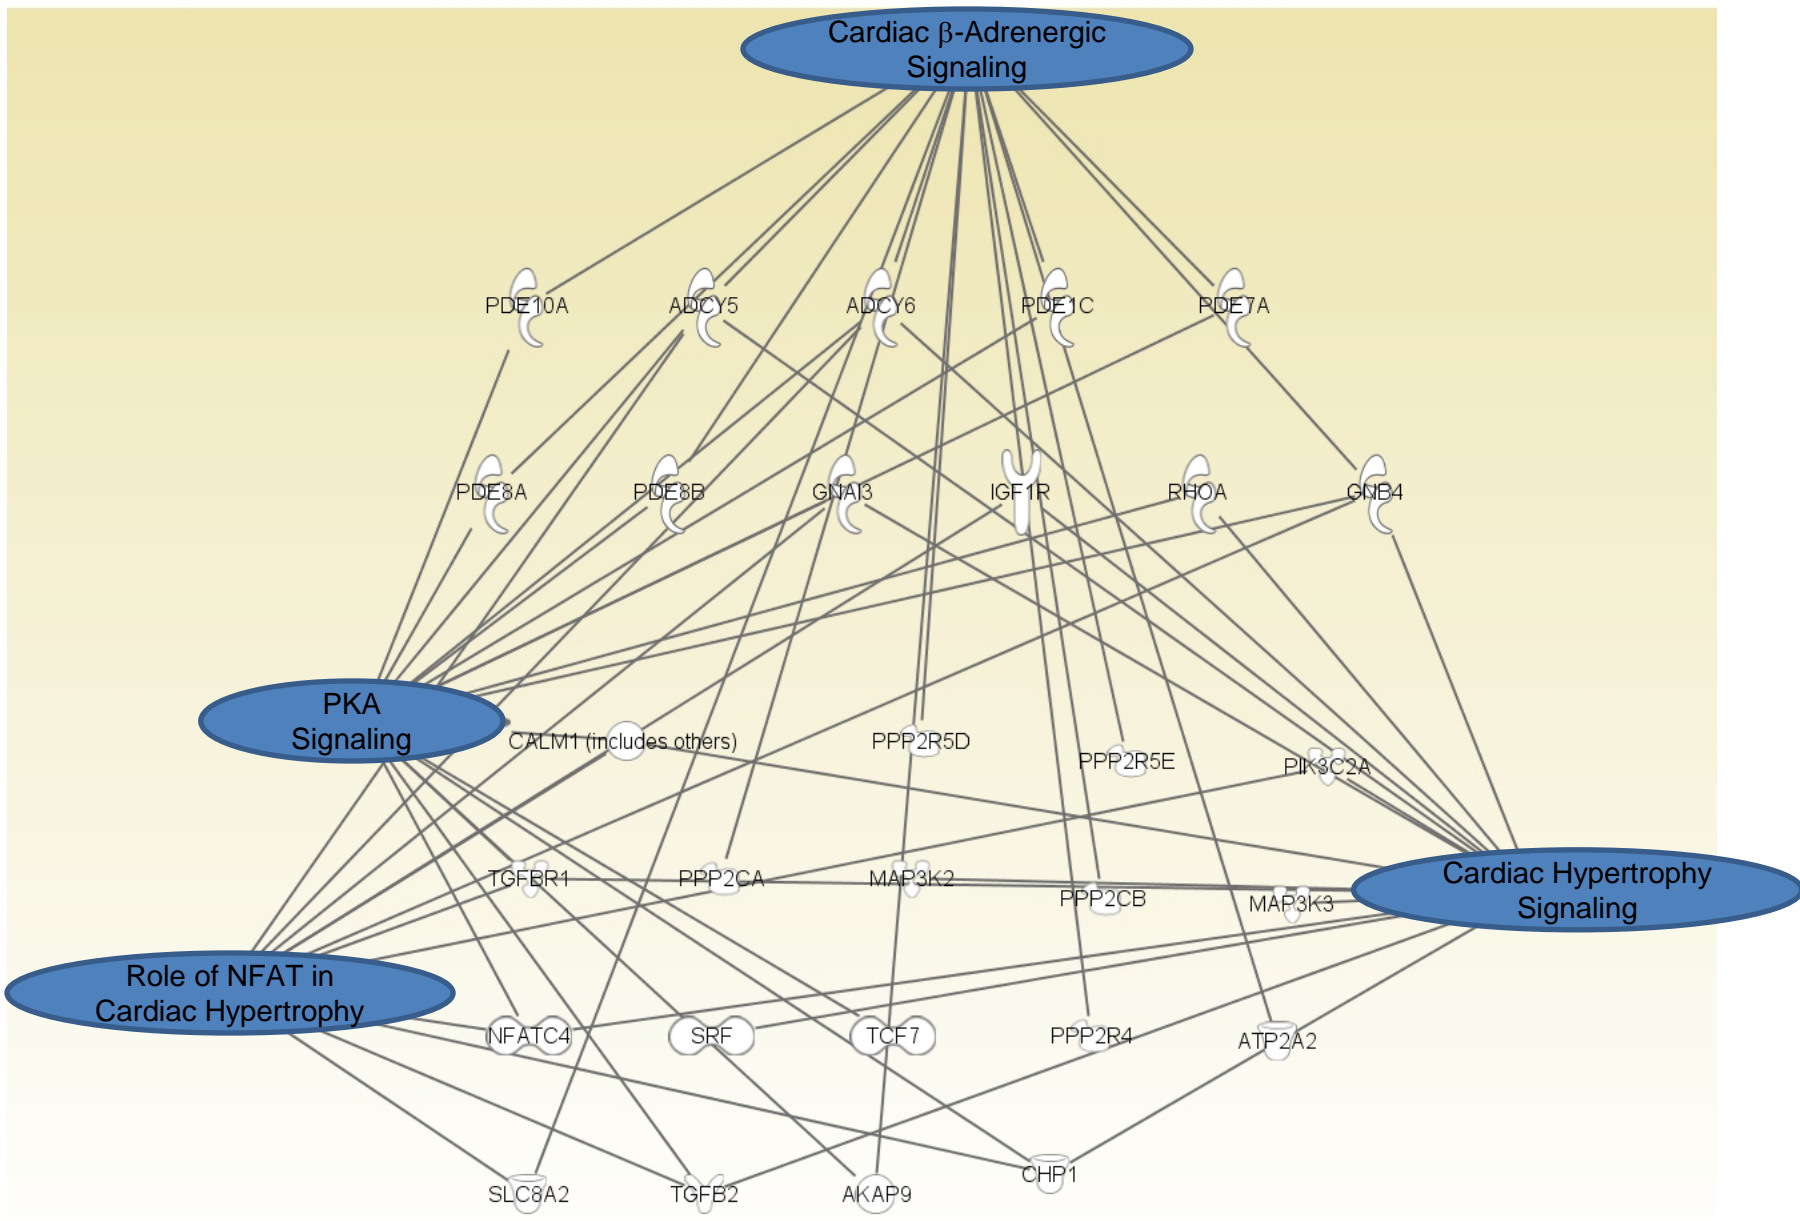

C.

Figure S1

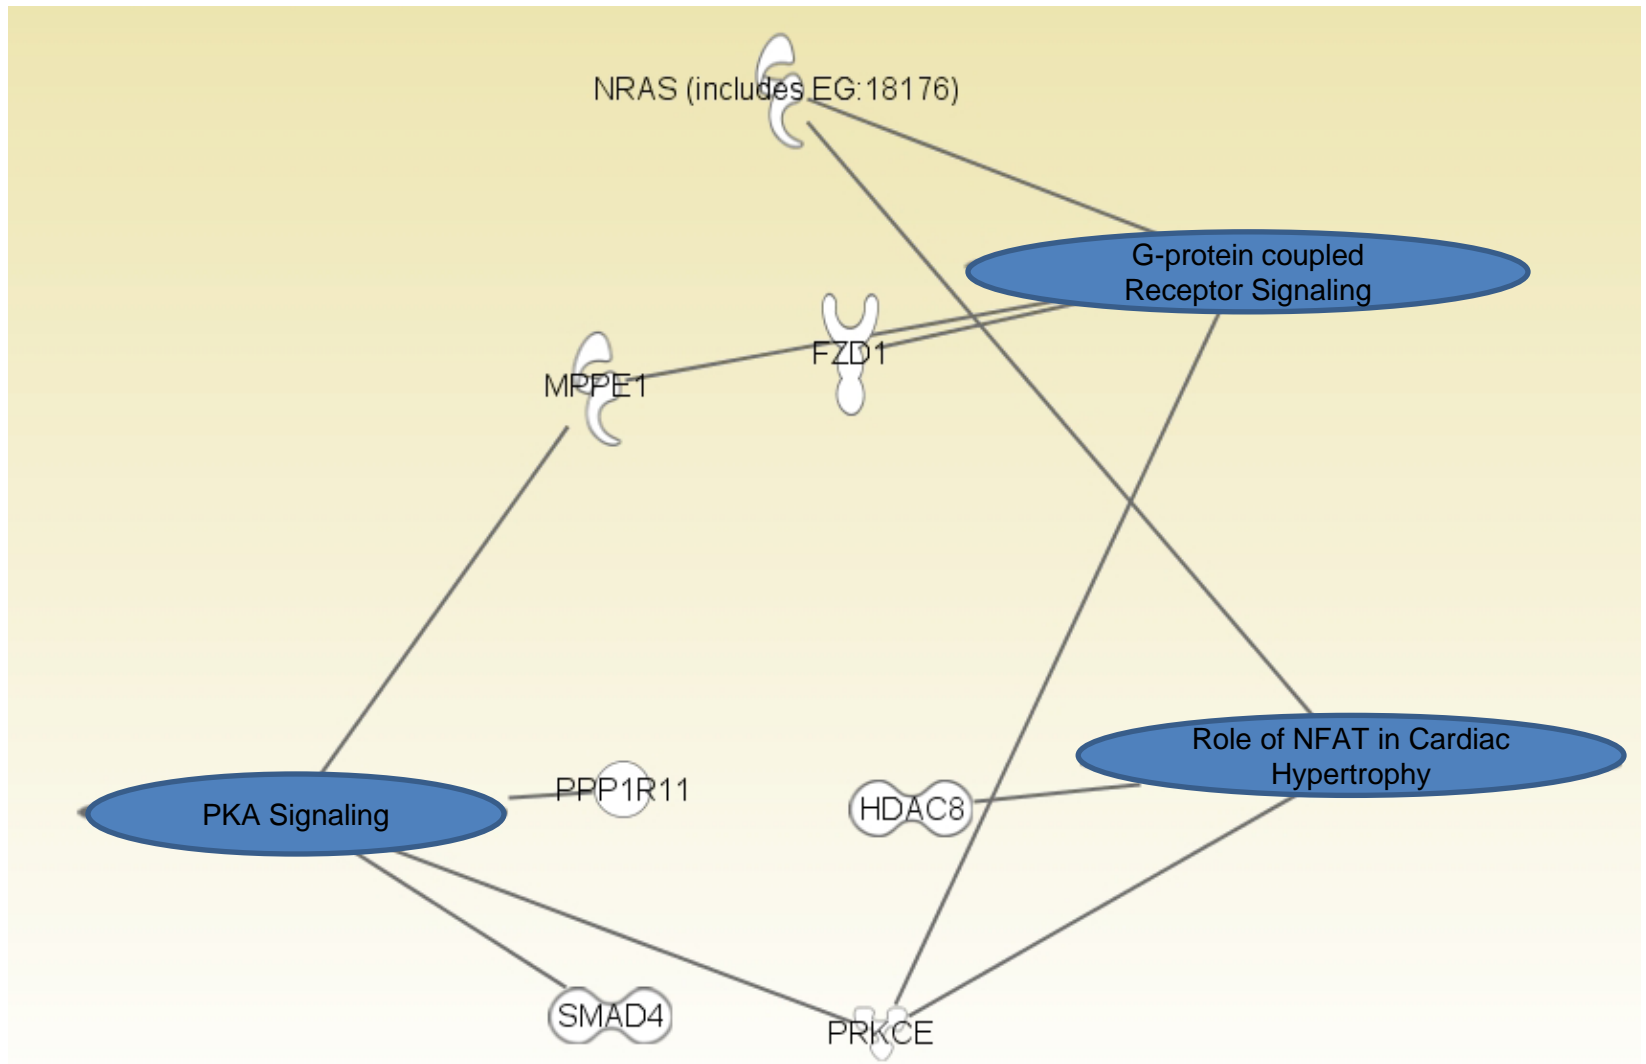

D.

Figure S1



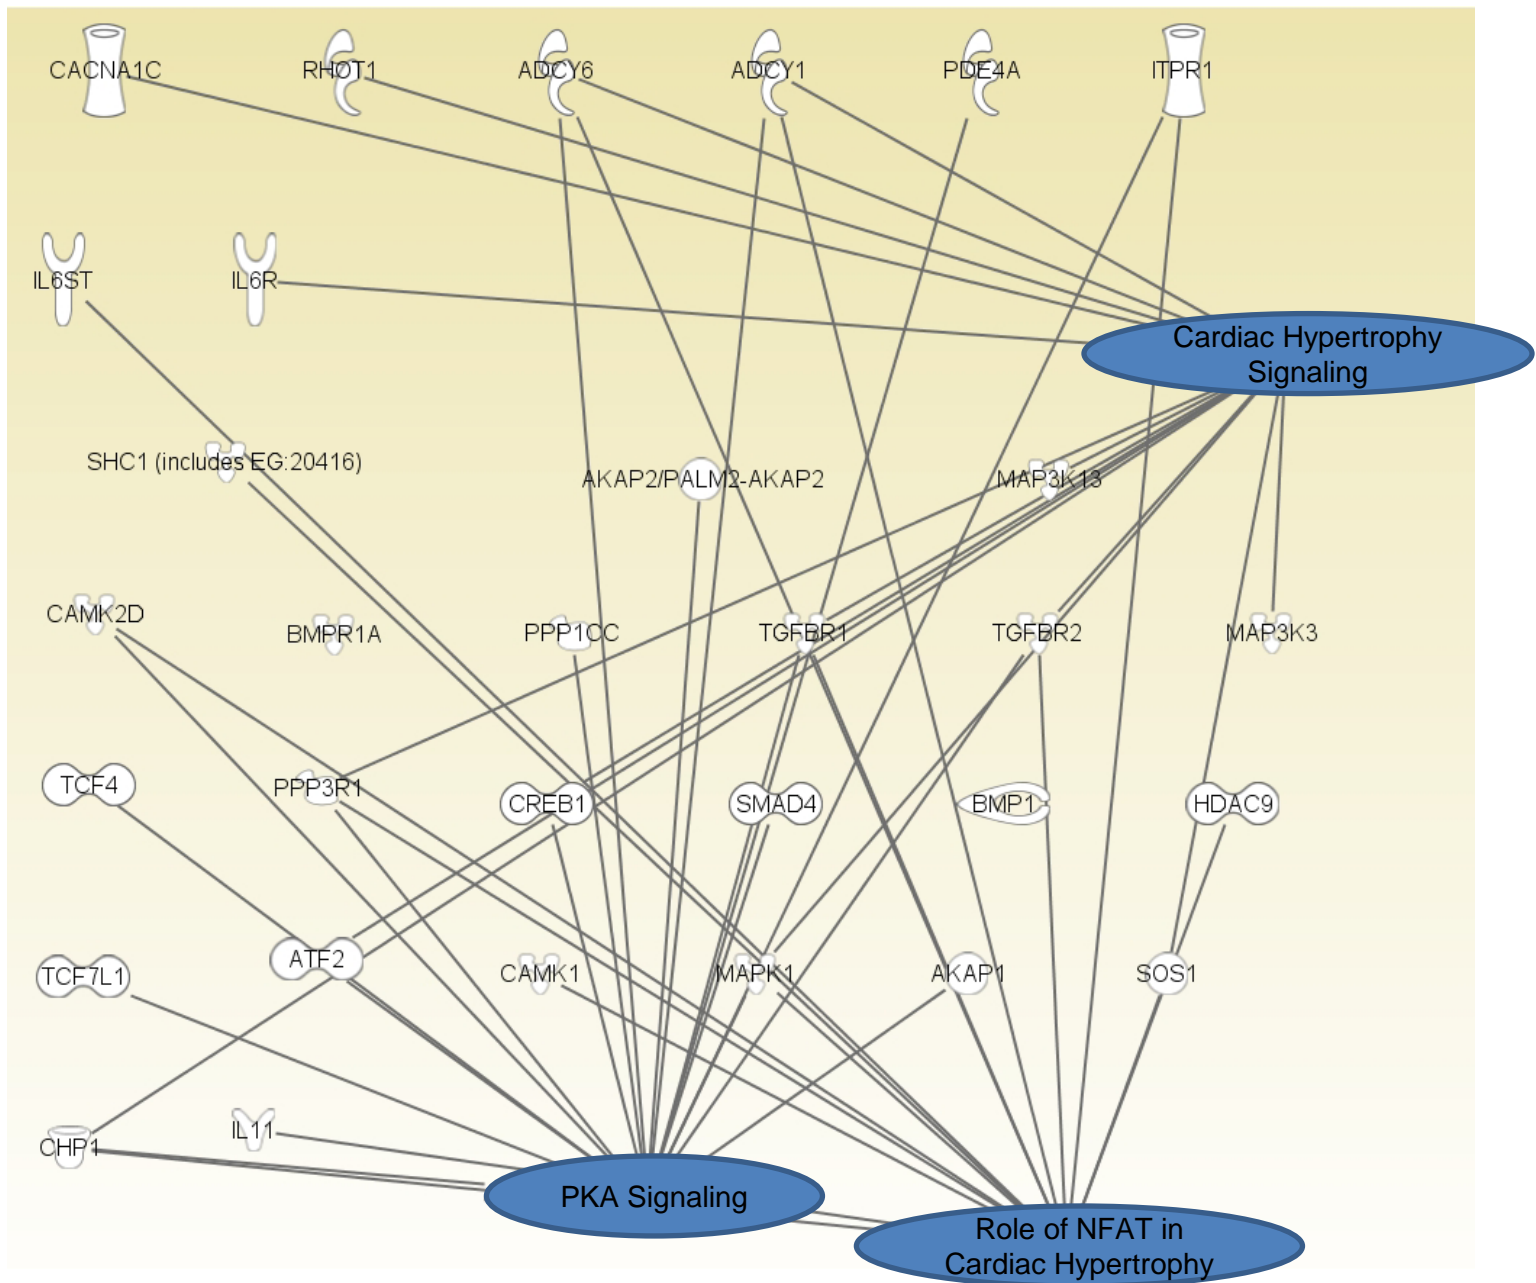

E.

Figure S1

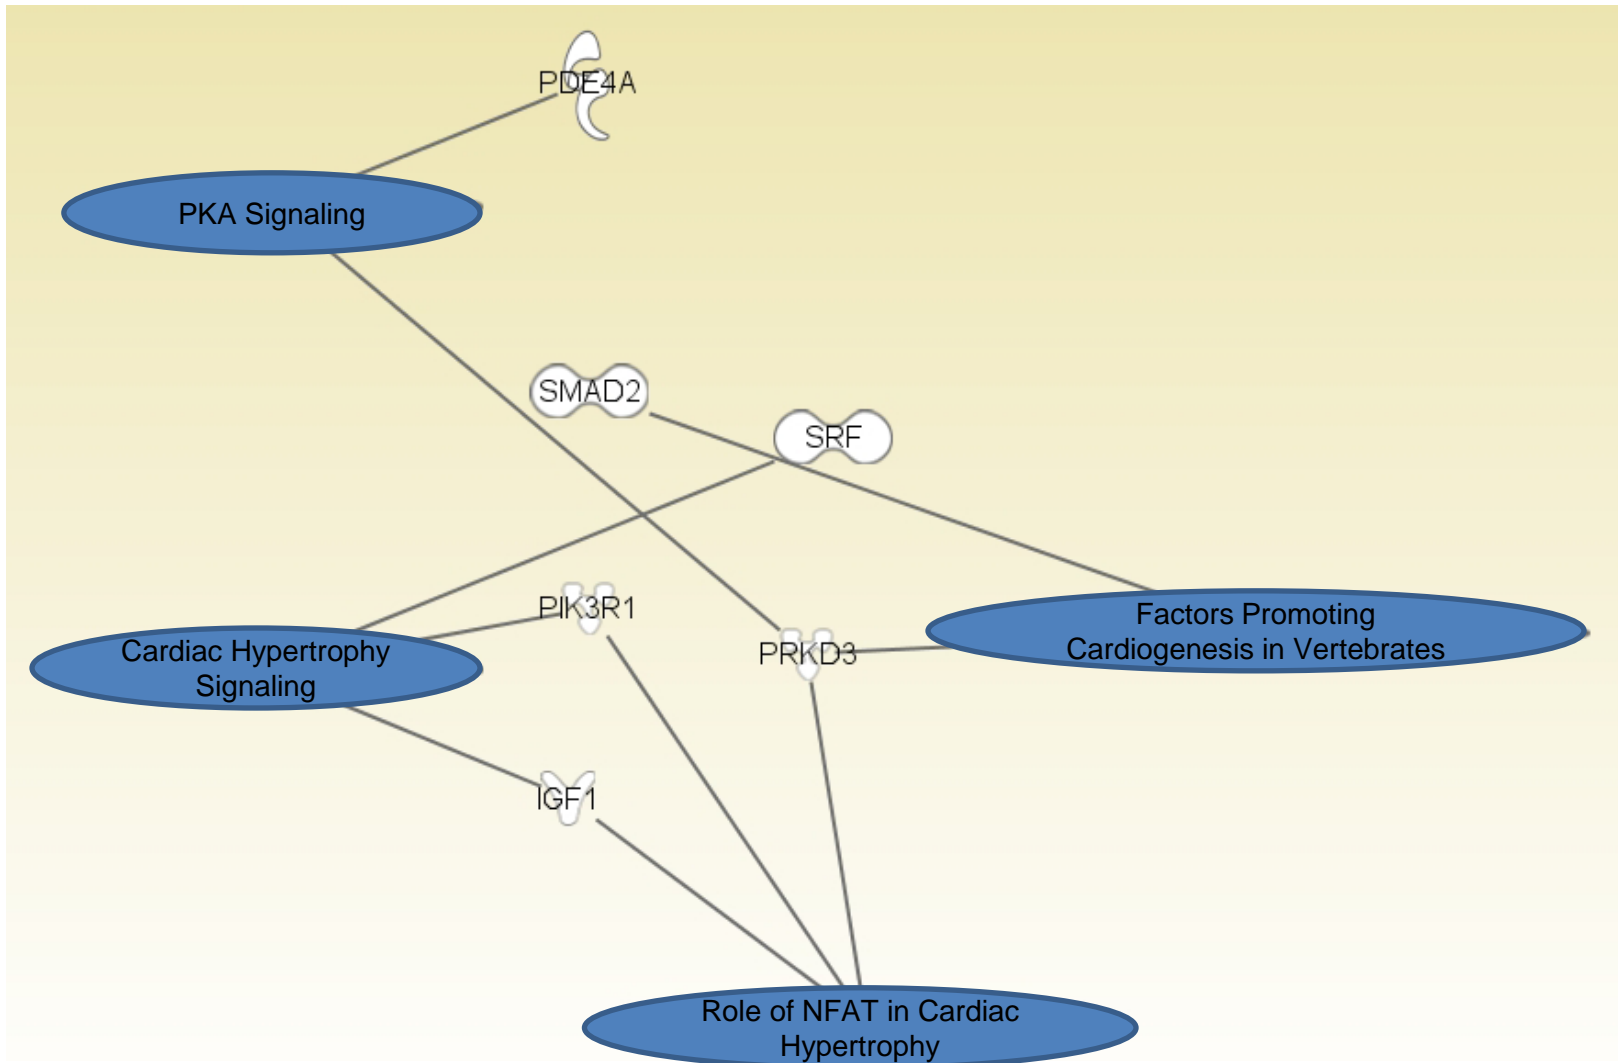

F.

Figure S1

| ID | Sex | Race  | Ethnicity | Group | Age at tissue collection | EF/FS  | Inotrope | Digoxin | ACEI | Beta Blocker | Diuretic | PDEi | miRNA array | miRNA RT-PCR |
|----|-----|-------|-----------|-------|--------------------------|--------|----------|---------|------|--------------|----------|------|-------------|--------------|
| 1  | F   | NA    | NA        | NF    | 1                        | EF 49% | X        |         |      |              |          |      |             | X            |
| 2  | M   | NA    | NA        | NF    | 1                        | NA     | NA       |         |      |              |          |      | X           | X            |
| 3  | F   | NA    | NA        | NF    | 2                        | EF 27% | X        |         |      |              |          |      |             | X            |
| 4  | F   | NA    | NA        | NF    | 3                        | EF 57% | X        |         |      |              |          |      |             | X            |
| 5  | M   | NA    | NA        | NF    | 7                        | EF 63% | X        |         |      |              |          |      | X           | X            |
| 6  | M   | NA    | NA        | NF    | 7                        | NA     | NA       |         |      |              |          |      | X           | X            |
| 7  | F   | NA    | NA        | NF    | 8                        | NA     | NA       |         |      |              |          |      |             | X            |
| 8  | F   | NA    | NA        | NF    | 9                        | EF 61% | X        |         |      |              | X        |      |             | X            |
| 9  | M   | NA    | NA        | NF    | 9                        | NA     | X        |         |      | X            |          |      |             | X            |
| 10 | M   | NA    | NA        | NF    | 10                       | NA     | NA       |         |      |              |          |      |             | X            |
| 11 | F   | NA    | NA        | NF    | 11                       | NA     | X        |         |      |              |          |      |             | X            |
| 12 | M   | NA    | NA        | NF    | 12                       | EF 39% |          |         |      |              |          |      | X           | X            |
| 13 | M   | NA    | NA        | NF    | 13                       | EF 50% | X        |         |      | X            |          |      |             | X            |
| 14 | M   | NA    | NA        | NF    | 14                       | NA     | NA       |         |      |              |          |      | X           |              |
| 15 | F   | White | NH        | IDC   | 0.3                      | EF 21% | X        |         | X    |              | X        | X    |             | X            |
| 16 | F   | NA    | NA        | IDC   | 0.8                      | EF 35% |          | X       | X    |              | X        |      |             | X            |
| 17 | M   | White | H         | IDC   | 1                        | EF 17% | X        |         | X    |              | X        | X    |             | X            |
| 18 | F   | White | H         | IDC   | 2                        | EF 41% | X        | X       | X    |              | X        | X    |             | X            |
| 19 | M   | White | NH        | IDC   | 3                        | EF 15% |          |         | X    |              | X        | X    | X           | X            |
| 20 | M   | Asian | NH        | IDC   | 3                        | EF 14% | X        | X       | X    |              | X        | X    | X           | X            |
| 21 | M   | Asian | NH        | IDC   | 3                        | EF 13% | X        |         | X    |              | X        |      | X           | X            |
| 22 | F   | White | H         | IDC   | 3                        | FS16%  | X        | X       | X    | X            | X        | X    |             | X            |
| 23 | F   | White | NH        | IDC   | 4                        | EF 32% |          | X       | X    |              | X        |      |             | X            |
| 24 | F   | Asian | NH        | IDC   | 4                        | EF 13% |          |         | X    |              | X        |      |             | X            |
| 25 | M   | White | H         | IDC   | 4                        | EF 15% | X        | X       | X    | X            | X        | X    | X           | X            |
| 26 | M   | White | NH        | IDC   | 5                        | FS 16% |          |         | X    |              |          |      |             | X            |
| 27 | F   | Asian | NH        | IDC   | 9                        | UK     | X        |         |      |              |          | X    | X           | X            |
| 28 | F   | White | H         | IDC   | 10                       | FS 22% | X        | X       | X    | X            | X        | X    |             | X            |
| 29 | F   | White | H         | IDC   | 11                       | EF 15% |          |         | X    |              | X        |      |             | X            |
| 30 | F   | White | NH        | IDC   | 12                       | EF 25% | X        |         |      |              | X        | X    |             | X            |
| 31 | F   | White | NH        | IDC   | 3.8                      | EF 32% | X        | X       | X    | X            | X        | X    |             | X            |
| 32 | F   | White | H         | IDC   | 12                       | EF 25% | X        |         | X    |              | X        |      |             | X            |

Table S1

| <b>Putative Targets</b> | <b>miRNAs</b>                     |
|-------------------------|-----------------------------------|
| Smad4                   | miR-1, miR-146a, miR-204, miR-27b |
| Calmodulin              | miR-1, miR-133b, miR-27b          |
| TGF $\beta$ receptor 1  | miR-133b, miR-204, miR-27b        |
| TGF $\beta$ receptor 3  | miR-133b, miR-204, miR-27b        |
| Adenylyl Cyclase 6      | miR-133b, miR-204, miR-27         |

Table S2
